# Supplementary material for: Development of a New Eco-Friendly Copolymer Based on Chitosan for Enhanced Removal of Pb and Cd from Water
Source: MDPI journal article supplement (doi:10.3390/polym14183735), 2022-09-07
Supplement: s1 [file s1]

# Development of a New Eco-Friendly Copolymer Based on Chitosan for Enhanced Removal of Pb and Cd from Water

Iolanda-Veronica Ganea <sup>1,2</sup>, Alexandrina Nan <sup>2,\*</sup>, Carmen Roba <sup>1</sup>, Iulia Neamțiu <sup>1,3</sup>, Eugen Gurzău <sup>3,4</sup>, Rodica Turcu <sup>2</sup>, Xenia Filip <sup>2</sup> and Călin Băciu <sup>1,\*</sup>

**Table S1.** Isotherm models used on CHIT-PAAA adsorption data

| Isotherm Models      | Nonlinear Forms                                                                    | Linear Forms                                                                              | References |
|----------------------|------------------------------------------------------------------------------------|-------------------------------------------------------------------------------------------|------------|
| Langmuir             | $q_e = \frac{q_{\max} \cdot K_L \cdot C_e}{1 + K_L \cdot C_e}$                     | $\frac{C_e}{q_e} = \frac{C_e}{q_{\max}} + \frac{1}{K_L \cdot q_{\max}}$                   | [1]        |
| Freundlich           | $q_e = K_F \cdot C_e^{1/n}$                                                        | $\ln q_e = \ln K_F + \frac{1}{n} \cdot \ln C_e$                                           | [2]        |
| Dubinin-Radushkevich | $q_e = q_s \cdot \exp(-K_{DR} \cdot \varepsilon^2)$                                | $\ln q_e = \ln q_s - K_{DR} \cdot \varepsilon^2$                                          | [3]        |
| Temkin               | $q_e = \frac{R \cdot T}{K_T} \cdot \ln A_T \cdot C_e$                              | $q_e = \frac{R \cdot T}{K_T} \cdot \ln A_T + \frac{R \cdot T}{K_T} \cdot \ln C_e$         | [4]        |
| Redlich-Peterson     | $q_e = \frac{K_R \cdot C_e}{1 + \alpha_R \cdot C_e^g}$                             | $\ln\left(\frac{C_e}{q_e}\right) = \alpha_R \cdot \ln C_e + \ln K_R$                      | [5]        |
| Sips                 | $q_e = \frac{q_{\max} \cdot K_S \cdot C_e^{\beta_S}}{1 + K_S \cdot C_e^{\beta_S}}$ | $\ln\left(\frac{q_e}{q_{\max} - q_e}\right) = \beta_S \cdot \ln C_e + \ln(K_S^{\beta_S})$ | [6]        |
| Toth                 | $q_e = \frac{K_t \cdot C_e}{(\alpha_t + C_e)^{1/t}}$                               | -                                                                                         | [7]        |
| Koble-Corrigan       | $q_e = \frac{A \cdot C_e^n}{1 + B \cdot C_e^n}$                                    | -                                                                                         | [8]        |
| Khan                 | $q_e = \frac{q_s \cdot b_K \cdot C_e}{(1 + b_K \cdot C_e)^{\alpha_K}}$             | -                                                                                         | [9]        |

where:  $q_e$  is the experimental amount of pollutant adsorbed per unit mass of material ( $\text{mg g}^{-1}$ );  $C_e$  is the concentration of pollutant at the equilibrium state ( $\text{mg L}^{-1}$ );  $q_{\max}$  represents the maximum amount of adsorbate ( $\text{mg g}^{-1}$ );  $K_L$  is the constant in the Langmuir adsorption model ( $\text{L mg}^{-1}$ );  $K_F$  ( $\text{mg} \cdot \text{g}^{-1}$ ) and  $n$  are both constants in the Freundlich adsorption model;  $q_s$  is the theoretical isotherm capacity ( $\text{mg g}^{-1}$ );  $\varepsilon$  and  $K_{DR}$  are the Dubinin–Radushkevich isotherm constants ( $\text{mol}^2 \text{kJ}^{-2}$ );  $K_T$  and  $A_T$  are the Temkin isotherm constant and equilibrium binding constant ( $\text{L g}^{-1}$ );  $R$  is the gas constant ( $\text{J mol}^{-1} \cdot \text{K}^{-1}$ );  $T$  is the absolute temperature (K);  $K_R$  ( $\text{L g}^{-1}$ ) and  $\alpha_R$  are the Redlich–Peterson isotherm constants ( $\text{mg}^{-1}$ );  $g$  is the Redlich–Peterson isotherm exponent;  $K_S$  is the Sips isotherm model constant ( $\text{L mg}^{-1}$ ) and  $\beta_S$  is the Sips isotherm model exponent;  $K_t$  ( $\text{mg g}^{-1}$ );  $\alpha_t$  ( $\text{L mg}^{-1}$ ) and  $t$  are the Toth isotherm constants;  $\alpha_K$  and  $b_K$  are the Khan isotherm model exponent and constant;  $A$  is Koble–Corrigan isotherm constant ( $\text{L}^n \cdot \text{mg}^{1-n} \cdot \text{g}^{-1}$ ) and  $B$  is Koble–Corrigan isotherm constant ( $(\text{L mg}^{-1})^n$ ).

**Table S2.** Kinetic models used on CHIT-PAAA adsorption data.

| Kinetic Model                         | Linear Form                                                                | References |
|---------------------------------------|----------------------------------------------------------------------------|------------|
| Pseudo-first-order                    | $\log(q_{e1} - q_{t1}) = \log q_{e1} - \left(\frac{k_1}{2.303}\right)t$    | [10]       |
| Pseudo-second-order                   | $\frac{t}{q_{t2}} = \frac{1}{k_2 q_{e2}^2} + \frac{t}{q_{e2}}$             | [11]       |
| Weber Morris intra-particle diffusion | $q_t = k_{ipd} \cdot t^{1/2} + C$                                          | [12]       |
| Elovich                               | $q_t = \frac{\ln \alpha \cdot \beta}{\beta} + \frac{1}{\beta} \cdot \ln t$ | [13]       |

where:  $q_{e1}$ ,  $q_{e2}$  represent the experimental amount of pollutant adsorbed at the equilibrium state ( $\text{mg g}^{-1}$ );  $q_t, q_{t1}, q_{t2}$  ( $\text{mg g}^{-1}$ ) are the amount of pollutant adsorbed at time  $t$  [min];  $k_1$  ( $\text{min}^{-1}$ ),  $k_2$  ( $\text{g g}^{-1} \cdot \text{min}^{-1}$ ) are the adsorption rate constants of the pseudo-first-order and pseudo-second-order adsorption models;  $\alpha$  is the initial adsorption rate ( $\text{mg g}^{-1} \cdot \text{min}^{-1}$ );  $\beta$  is a

desorption constant related to the extent of surface coverage and activation energy for chemisorption ( $\text{g mg}^{-1}$ );  $k_{\text{ipd}}$  is the intra-particle diffusion rate constant ( $\text{mg g}^{-1} \cdot \text{min}^{-1}$ );  $C$  is the intercept that gives an idea about the thickness of the boundary layer ( $\text{mg g}^{-1}$ ).  $K_1$  and  $K_2$  parameters and  $q_e$  were calculated from the intercepts and slopes obtained by plotting  $\ln(q_e - q_t)$  versus  $t$  and  $t/q_t$  versus  $t$ , respectively.  $\alpha$  and  $\beta$  Elovich maximum adsorption capacity and constant were calculated from the slopes and the intercepts obtained by plotting  $q_t$  versus  $\ln(t)$ , while  $K_{\text{ipd}}$  was determined from the plot of  $q_t$  versus  $t^{1/2}$ .

**Table S3.** Geographic coordinates of the collected metal-polluted water samples.

| Sample | Mining Site   | Coordinates |            |
|--------|---------------|-------------|------------|
|        |               | Latitude    | Longitude  |
| RM4    | Roşia Montană | 46°18'16"N  | 23°06'09"E |
| RM6    | Roşia Montană | 46°18'23"N  | 23°05'00"E |
| RM8    | Roşia Montană | 46°18'04"N  | 23°07'06"E |
| RM25   | Roşia Montană | 46°17'31"N  | 23°07'22"E |
| NB4    | Novăţ-Borşa   | 47°43'10"N  | 24°34'41"E |
| NB6    | Novăţ-Borşa   | 47°43'19"N  | 24°34'29"E |
| NB8    | Novăţ-Borşa   | 47°43'19"N  | 24°34'17"E |
| NB10   | Novăţ-Borşa   | 47°43'29"N  | 24°34'21"E |

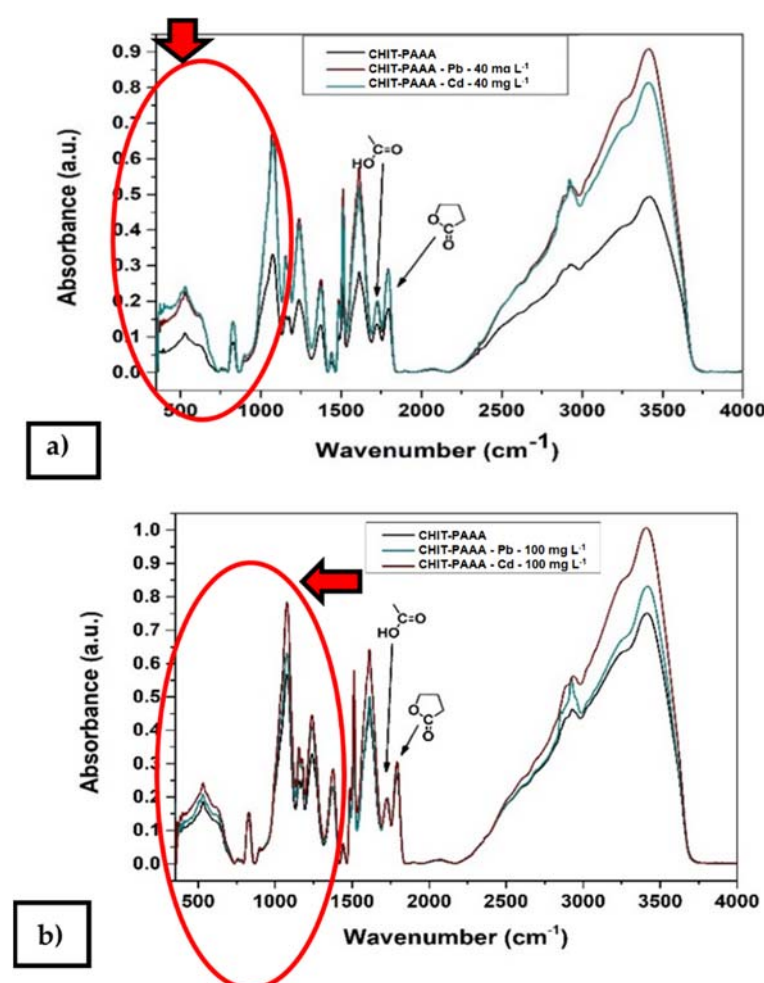

**Figure S1.** FTIR of CHIT-PAAA before and after adsorption of Pb and Cd from 40  $\text{mg L}^{-1}$  (a) and 100  $\text{mg L}^{-1}$  (b) stock solutions.

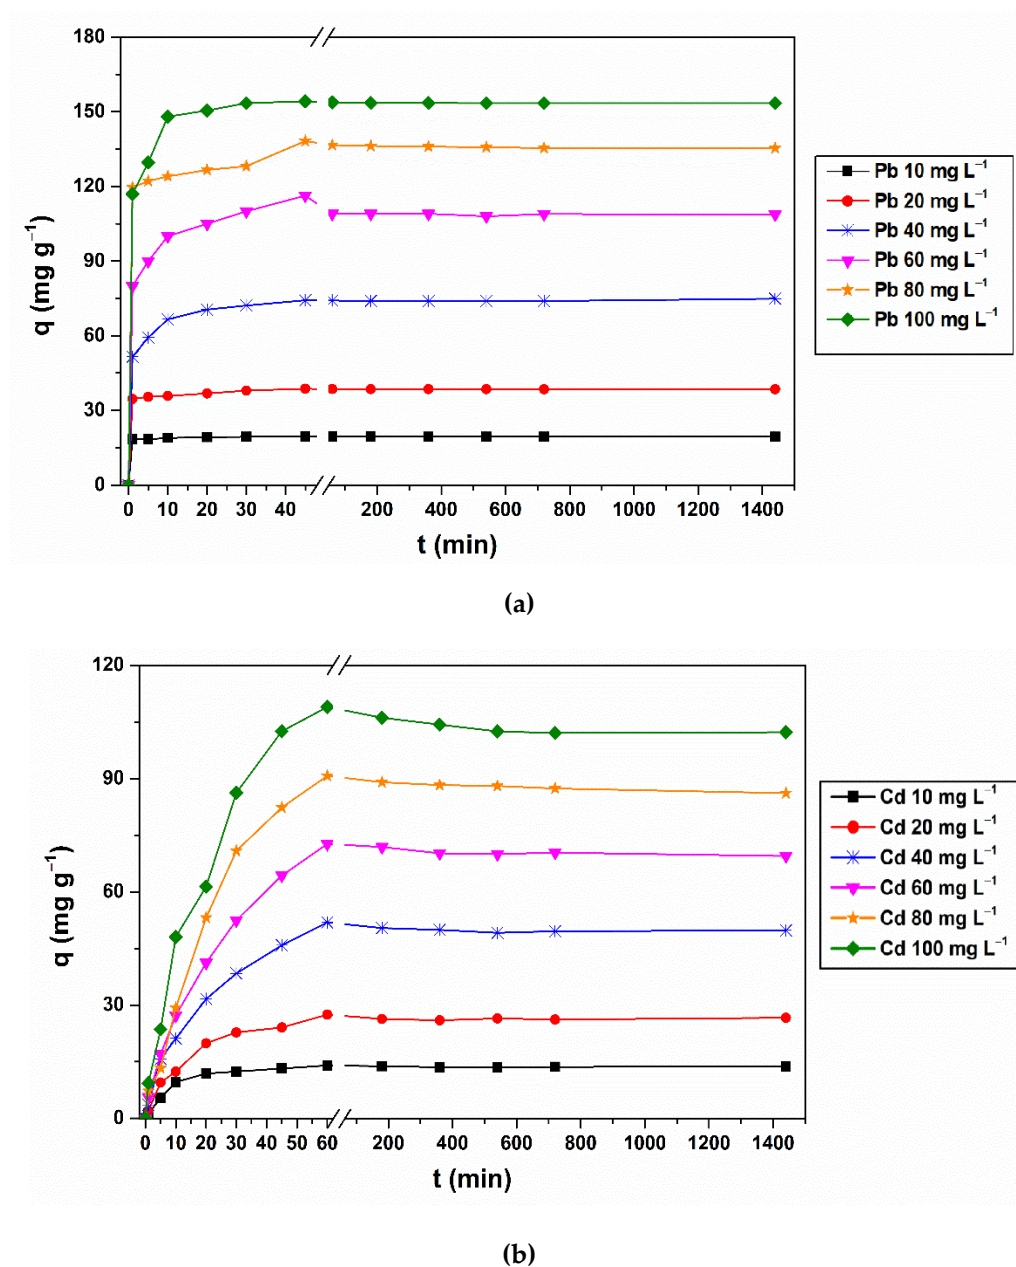

**Figure S2.** The effect of contact time on Pb (a) and Cd (b) sorption capacities of CHIT-PAAA.

**Table S4.** Results of the Pb and Cd adsorption equilibrium study performed on CHIT-PAAA. ( $C_i = 10\text{--}100\text{ mg L}^{-1}$ ,  $0.02\text{ g material}$ ,  $298\text{ K}$ ,  $600\text{ rpm}$ ,  $24\text{ h}$ ).

| Isotherms  | Forms     | Coefficients                  | Pb      | Cd      |
|------------|-----------|-------------------------------|---------|---------|
| Langmuir   | Linear    | $K_L (\text{L mg}^{-1})$      | 0.350   | 0.030   |
|            |           | $q_{\max} (\text{mg g}^{-1})$ | 170.068 | 180.505 |
|            |           | $R^2$                         | 0.999   | 0.998   |
|            | Nonlinear | RMSE                          | 0.003   | 0.007   |
|            |           | $K_L (\text{L mg}^{-1})$      | 0.330   | 0.023   |
|            |           | $q_{\max} (\text{mg g}^{-1})$ | 170.343 | 188.721 |
| Freundlich | Linear    | $R^2$                         | 0.997   | 0.999   |
|            |           | RMSE                          | 3.903   | 1.302   |
|            |           | $K_F (\text{mg g}^{-1})$      | 35.909  | 6.391   |
|            |           | $n$                           | 2.252   | 1.375   |

|                             |           |                                               |                        |                        |
|-----------------------------|-----------|-----------------------------------------------|------------------------|------------------------|
| <b>Dubinin-Radushkevich</b> | Nonlinear | $R^2$                                         | 0.977                  | 0.997                  |
|                             |           | RMSE                                          | 0.182                  | 0.066                  |
|                             |           | $K_F$ (mg g <sup>-1</sup> )                   | 50.460                 | 7.914                  |
|                             |           | n                                             | 2.681                  | 1.511                  |
|                             |           | $R^2$                                         | 0.981                  | 0.998                  |
|                             |           | RMSE                                          | 11.385                 | 2.414                  |
|                             | Linear    | $K_{DR}$ (mol <sup>2</sup> kJ <sup>-2</sup> ) | 0.001                  | 0.005                  |
|                             |           | $q_s$ (mg g <sup>-1</sup> )                   | 88.677                 | 52.668                 |
|                             |           | E (kJ mol <sup>-1</sup> )                     | 19.780                 | 10.011                 |
|                             |           | $R^2$                                         | 0.899                  | 0.869                  |
|                             |           | RMSE                                          | 0.372                  | 0.583                  |
|                             |           | $K_{DR}$ (mol <sup>2</sup> kJ <sup>-2</sup> ) | $4.618 \cdot 10^{-7}$  | $16.540 \cdot 10^{-6}$ |
| <b>Temkin</b>               | Nonlinear | $q_s$ (mg g <sup>-1</sup> )                   | 132.555                | 91.859                 |
|                             |           | E (kJ mol <sup>-1</sup> )                     | 1.040                  | 0.175                  |
|                             |           | $R^2$                                         | 0.927                  | 0.931                  |
|                             |           | RMSE                                          | 22.305                 | 13.994                 |
|                             |           | $A_T$ (L g <sup>-1</sup> )                    | 1.843                  | 2.549                  |
|                             |           | $K_T$                                         | 47.476                 | 77.448                 |
|                             | Linear    | $R^2$                                         | 0.996                  | 0.983                  |
|                             |           | RMSE                                          | 5.469                  | 6.999                  |
|                             |           | $A_T$ (L g <sup>-1</sup> )                    | 5.133                  | 0.392                  |
|                             |           | $K_T$                                         | 77.657                 | 77.446                 |
|                             |           | $R^2$                                         | 0.995                  | 0.983                  |
|                             |           | RMSE                                          | 5.469                  | 6.999                  |
| <b>Redlich-Peterson</b>     | Nonlinear | $K_R$ (L g <sup>-1</sup> )                    | 41.305                 | 6.391                  |
|                             |           | $\alpha_R$ (mg <sup>-1</sup> )                | 0.525                  | 0.272                  |
|                             |           | $R^2$                                         | 0.986                  | 0.979                  |
|                             |           | RMSE                                          | 0.168                  | 0.066                  |
|                             |           | $K_R$ (L g <sup>-1</sup> )                    | 74.333                 | 5.432                  |
|                             |           | $\alpha_R$ (mg <sup>-1</sup> )                | 0.624                  | 0.087                  |
|                             | Linear    | g                                             | 0.888                  | 0.748                  |
|                             |           | $R^2$                                         | 0.999                  | 0.999                  |
|                             |           | RMSE                                          | 2.151                  | 0.738                  |
|                             |           | $q_{max}$ (L mg <sup>-1</sup> )               | 170.068                | 180.505                |
|                             |           | $K_s$ (L mg <sup>-1</sup> )                   | 1.00008                | 0.026                  |
|                             |           | $\beta_s$                                     | 0.005                  | 0.992                  |
| <b>Sips</b>                 | Nonlinear | $R^2$                                         | 0.997                  | 0.999                  |
|                             |           | RMSE                                          | 0.002                  | 0.035                  |
|                             |           | $q_{max}$ (L mg <sup>-1</sup> )               | 59.438                 | 5.487                  |
|                             |           | $K_s$ (L mg <sup>-1</sup> )                   | 0.312                  | 0.022                  |
|                             |           | $\beta_s$                                     | 0.824                  | 0.889                  |
|                             |           | $R^2$                                         | 0.999                  | 0.999                  |
| <b>Toth</b>                 | Nonlinear | RMSE                                          | 1.339                  | 0.916                  |
|                             |           | $K_t$                                         | 50.474                 | 7.917                  |
|                             |           | $\alpha_t$                                    | $1.074 \cdot 10^{-16}$ | $1.430 \cdot 10^{-17}$ |
|                             |           | t                                             | 1.594                  | 2.955                  |
|                             |           | $R^2$                                         | 0.981                  | 0.998                  |
|                             |           | RMSE                                          | 13.147                 | 2.787                  |
| <b>Koble-Corrigan</b>       | Nonlinear | A                                             | 59.438                 | 5.487                  |
|                             |           | n                                             | 0.824                  | 0.889                  |
|                             |           | B                                             | 0.312                  | 0.022                  |

|      |           |                |         |        |
|------|-----------|----------------|---------|--------|
| Khan | Nonlinear | R <sup>2</sup> | 0.999   | 0.999  |
|      |           | RMSE           | 1.339   | 0.916  |
|      |           | q <sub>s</sub> | 111.567 | 66.047 |
|      |           | b <sub>K</sub> | 0.619   | 0.076  |
|      |           | α <sub>K</sub> | 0.857   | 0.569  |
|      |           | R <sup>2</sup> | 0.999   | 0.999  |
|      |           | RMSE           | 2.459   | 0.636  |

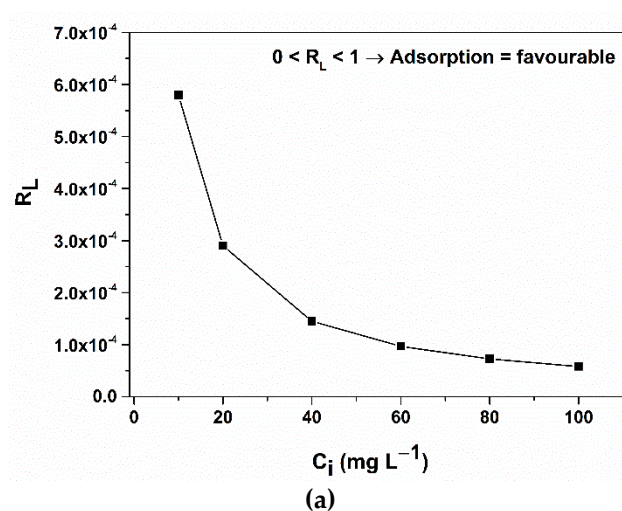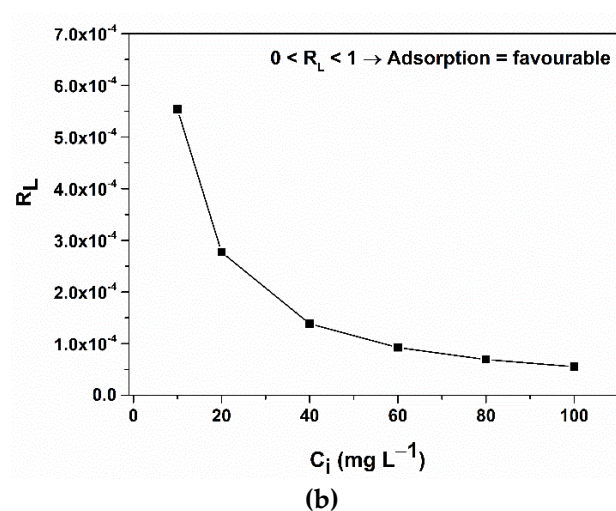

Figure S3. Separation factors determined for Pb (a) and Cd (b) adsorption onto CHIT-PAAA.

Table S5. Results of the kinetic models applied for Pb and Cd sorption onto CHIT-PAAA ( $C_i = 10$ – $100$  mg L<sup>-1</sup>, 0.04 g material, 298 K, 600 rpm).

| C <sub>i</sub><br>(mg<br>L <sup>-1</sup> ) | q <sub>e</sub><br>(mg<br>g <sup>-1</sup> ) | Pseudo-First Order                     |                                          |                | Pseudo-Second Order       |                                                              |                                          |                | Weber Morris Intra-Particle Diffusion                            |                     |                | Elovich                                          |                                                  |                |
|--------------------------------------------|--------------------------------------------|----------------------------------------|------------------------------------------|----------------|---------------------------|--------------------------------------------------------------|------------------------------------------|----------------|------------------------------------------------------------------|---------------------|----------------|--------------------------------------------------|--------------------------------------------------|----------------|
|                                            |                                            | k <sub>1</sub><br>(min <sup>-1</sup> ) | q <sub>e1</sub><br>(mg g <sup>-1</sup> ) | R <sup>2</sup> | τ <sub>1/2</sub><br>(min) | k <sub>2</sub><br>(g mg <sup>-1</sup><br>min <sup>-1</sup> ) | q <sub>e2</sub><br>(mg g <sup>-1</sup> ) | R <sup>2</sup> | k <sub>ipd</sub><br>(mg g <sup>-1</sup><br>min <sup>-1/2</sup> ) | I                   | R <sup>2</sup> | α<br>(mg<br>g <sup>-1</sup> ·min <sup>-1</sup> ) | β<br>(mg<br>g <sup>-1</sup> ·min <sup>-1</sup> ) | R <sup>2</sup> |
| Pb                                         |                                            |                                        |                                          |                |                           |                                                              |                                          |                |                                                                  |                     |                |                                                  |                                                  |                |
| 10                                         | 19.410                                     | 2.19 10 <sup>-3</sup>                  | 0.111                                    | 0.387          | 0.027                     | 1.895                                                        | 19.414                                   | 1              | 0.009                                                            | 18.957              | 0.545          | 4.60 10 <sup>53</sup>                            | 6.752                                            | 0.809          |
| 20                                         | 38.500                                     | 0.08 10 <sup>-3</sup>                  | 0.915                                    | 0.526          | 0.219                     | 0.119                                                        | 38.506                                   | 1              | 0.031                                                            | 36.531              | 0.625          | 6.66 10 <sup>25</sup>                            | 1.708                                            | 0.866          |
| 40                                         | 74.920                                     | 1.41 10 <sup>-3</sup>                  | 4.105                                    | 0.607          | 1.880                     | 0.007                                                        | 74.738                                   | 0.999          | 0.163                                                            | 65.388              | 0.574          | 2.63 10 <sup>9</sup>                             | 0.354                                            | 0.845          |
| 60                                         | 108.757                                    | 2.53 10 <sup>-3</sup>                  | 12.600                                   | 0.421          | 0.035                     | 0.265                                                        | 108.696                                  | 0.999          | 0.242                                                            | 99.622              | 0.450          | 1.21 10 <sup>12</sup>                            | 0.294                                            | 0.746          |
| 80                                         | 135.360                                    | 1.96 10 <sup>-3</sup>                  | 7.145                                    | 0.501          | 0.069                     | 0.106                                                        | 135.501                                  | 1              | 0.139                                                            | 126.68 <sub>8</sub> | 0.630          | 1.05 10 <sup>21</sup>                            | 0.393                                            | 0.847          |
| 100                                        | 153.422                                    | 1.10 10 <sup>-3</sup>                  | 3.032                                    | 0.448          | 0.169                     | 0.039                                                        | 153.374                                  | 1              | 0.281                                                            | 141.61 <sub>1</sub> | 0.484          | 1.57 10 <sup>14</sup>                            | 0.239                                            | 0.774          |
| Cd                                         |                                            |                                        |                                          |                |                           |                                                              |                                          |                |                                                                  |                     |                |                                                  |                                                  |                |
| 10                                         | 13.720                                     | 4.54 10 <sup>-3</sup>                  | 2.207                                    | 0.633          | 4.468                     | 1.63 10 <sup>-2</sup>                                        | 13.736                                   | 0.999          | 0.194                                                            | 8.867               | 0.562          | 39.299                                           | 0.651                                            | 0.840          |
| 20                                         | 26.620                                     | 4.61 10 <sup>-3</sup>                  | 6.768                                    | 0.715          | 7.132                     | 5.25 10 <sup>-3</sup>                                        | 26.695                                   | 0.999          | 0.450                                                            | 15.113              | 0.633          | 27.690                                           | 0.300                                            | 0.884          |
| 40                                         | 49.760                                     | 4.40 10 <sup>-3</sup>                  | 13.182                                   | 0.645          | 7.278                     | 2.74 10 <sup>-3</sup>                                        | 50.075                                   | 0.999          | 0.925                                                            | 26.409              | 0.660          | 32.495                                           | 0.150                                            | 0.898          |



|     |         |                      |        |       |       |                      |         |       |       |        |       |        |       |       |
|-----|---------|----------------------|--------|-------|-------|----------------------|---------|-------|-------|--------|-------|--------|-------|-------|
| 60  | 69.440  | $4.51 \cdot 10^{-3}$ | 16.639 | 0.572 | 6.810 | $2.09 \cdot 10^{-3}$ | 70.225  | 0.999 | 1.378 | 35.324 | 0.670 | 34.233 | 0.102 | 0.898 |
| 80  | 86.120  | $4.35 \cdot 10^{-3}$ | 20.204 | 0.562 | 7.280 | $1.57 \cdot 10^{-3}$ | 87.336  | 0.999 | 1.753 | 43.359 | 0.648 | 36.615 | 0.079 | 0.879 |
| 100 | 102.260 | $3.43 \cdot 10^{-3}$ | 24.805 | 0.518 | 5.326 | $1.82 \cdot 10^{-3}$ | 102.987 | 0.999 | 1.882 | 56.037 | 0.624 | 69.705 | 0.072 | 0.870 |

**Table S6.** Performance of algorithms applied for ANN modeling of Pb and Cd adsorption onto CHIT-PAAA.

| Algorithm                        | Function        | Pb             |                      |                | Cd             |                      |                |
|----------------------------------|-----------------|----------------|----------------------|----------------|----------------|----------------------|----------------|
|                                  |                 | No. of Neurons | MSE                  | R <sup>2</sup> | No. of Neurons | MSE                  | R <sup>2</sup> |
| Levenberg–Marquardt              | <i>trainlm</i>  | 5              | $8.88 \cdot 10^{-2}$ | 0.999          | 6              | $7.89 \cdot 10^{-2}$ | 0.999          |
| Resilient Backpropagation        | <i>trainrp</i>  | 7              | 9.37                 | 0.997          | 15             | 40.4                 | 0.975          |
| Fletcher–Reeves                  | <i>traincgf</i> | 10             | 5.39                 | 0.998          | 6              | 11.4                 | 0.992          |
| Conjugate Gradient Polak–Ribière | <i>traincgp</i> | 13             | 6.04                 | 0.998          | 7              | 14.4                 | 0.991          |
| Conjugate Gradient Powell–Beale  | <i>traincgb</i> | 17             | 4.34                 | 0.998          | 7              | 14.2                 | 0.992          |
| Scaled Conjugate Gradient        | <i>trainscg</i> | 15             | 3.62                 | 0.999          | 7              | 13.3                 | 0.990          |
| BFGS                             | <i>trainbfg</i> | 15             | 25.90                | 0.993          | 23             | 97.3                 | 0.943          |
| Quasi-Newton                     | <i>trainbfg</i> | 15             | 25.90                | 0.993          | 23             | 97.3                 | 0.943          |
| One Step Secant                  | <i>trainoss</i> | 18             | 7.36                 | 0.998          | 8              | 20.7                 | 0.988          |

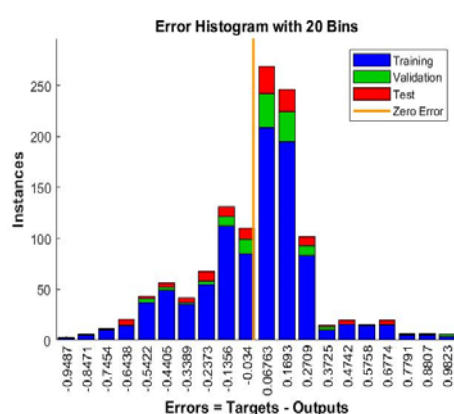

(a)

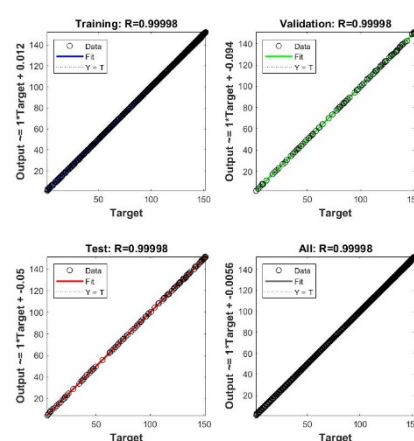

(b)

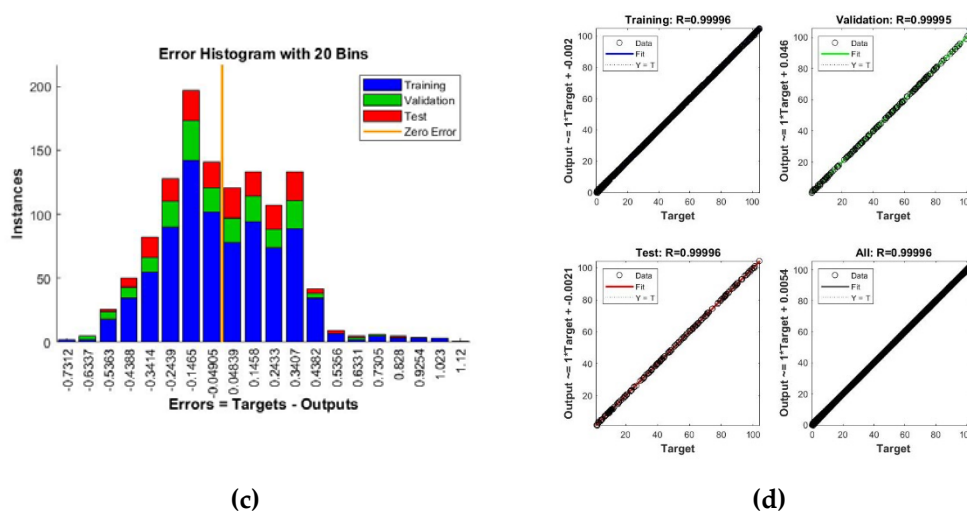

**Figure S4.** Error histograms and regression plots of Pb (a,b) and Cd (c,d) ANN adsorption models generated with Levenberg–Marquardt algorithm.

**Table S7.** Comparison between calculated and ANN predicted values of the metal amount adsorbed onto CHIT-PAAA.

| $C_i$<br>(mg L <sup>-1</sup> ) | $q_e$<br>(mg g <sup>-1</sup> ) | $q_e$ ANN<br>(mg g <sup>-1</sup> ) | MSE    |
|--------------------------------|--------------------------------|------------------------------------|--------|
| <b>Pb</b>                      |                                |                                    |        |
| 10                             | 19.410                         | 19.384                             | 0.026  |
| 20                             | 38.500                         | 38.479                             | 0.021  |
| 40                             | 74.920                         | 74.917                             | 0.003  |
| 60                             | 108.757                        | 108.752                            | 0.005  |
| 80                             | 135.360                        | 135.356                            | 0.004  |
| 100                            | 153.422                        | 153.4173                           | 0.0047 |
| <b>Cd</b>                      |                                |                                    |        |
| 10                             | 13.72                          | 13.715                             | 0.005  |
| 20                             | 26.62                          | 26.616                             | 0.004  |
| 40                             | 49.76                          | 49.673                             | 0.087  |
| 60                             | 69.44                          | 69.319                             | 0.121  |
| 80                             | 86.12                          | 86.101                             | 0.019  |
| 100                            | 102.26                         | 101.925                            | 0.335  |

## References

- Langmuir, I. The Constitution and Fundamental Properties of Solids and Liquids. Part II.-Liquids. J. Franklin Inst. 1917, 184, 721.
- Freundlich, H. Über Die Absorption in Lösungen. Zeitschrift für Phys. Chemie- Stöchiometrie und Verwandtschaftslehre 1907, 57, 385–470.
- Dubin, M.M.; Radushkevich, L.V.. The Equation of the Characteristic Curve of Activated Charcoal. Proc. Acad. Sci. USSR Phys. Chem. Sect. 1947, 55, 331–337.
- Temkin, M.J.; Pyzhev, V. Kinetics of Ammonia Synthesis on Promoted Iron Catalysts. Acta Physicochim. URSS 1940, 12, 217–222.
- Redlich, O.; Peterson, D.L. A Useful Adsorption Isotherm. J. Phys. Chem. 1959, 63, 1024.
- Sips, R. Combined Form of Langmuir and Freundlich Equations. J. Phys. Chem. 1948, 16, 490–495.
- Toth, J. State Equation of the Solid Gas Interface Layer. Acta Chim. 1971, 69, 311–317.
- Koble, R.A.; Corrigan, T.E. Adsorption Isotherms for Pure Hydrocarbons. Ind. Eng. Chem. 1952, 44, 383–387.
- Khan, A.R.; Ataullah, R.; Al-Haddad, A. Equilibrium Adsorption Studies of Some Aromatic Pollutants from Dilute Aqueous Solutions on Activated Carbon at Different Temperatures. J. Colloid Interface Sci. 1994, 194, 154–165.
- Lagergren, S.; Sven, K. Zur Theorie Der Sogennanten Adsorptiongeloster Stoffe. K. Svenska Vetenskapsakademiens. Handl.

- 
- 1898, 24, 1–39.
11. Ho, Y.S.; McKay, G. The Kinetics of Sorption of Divalent Metal Ions onto Sphagnum Moss Peat. *Water Res.* 2000, 34, 735–742.
  12. Weber, W.J.; Morris, J.C. Kinetic of Adsorption on Carbon from Solution. *Am. Soc. Civ. Eng.* 1963, 89, 1–40.
  13. Zeldowitsch, J. Über Den Mechanismus Der Katalytischen Oxidation Von CO a MnO<sub>2</sub>. *URSS Acta Physiochim.* 1934, 1, 364–449.
